# Supplementary material for: Catalysis by Pd nanoclusters generated in situ of high-efficiency synthesis of aromatic azo compounds from nitroaromatics under H2 atmosphere
Source: Royal Society of Chemistry journal article supplement (doi:10.1039/c3ra23004j), 2013-01-01
Supplement: c3ra23004j.pdf [file c3ra23004j.pdf]

# Catalysis by Pd Nanoclusters Generated In Situ of High-Efficiency Synthesis of Aromatic Azo Compounds from Nitroaromatics under H<sub>2</sub> Atmosphere

Jiaqing Wang, Lei Hu, Xueqin Cao, Jianmei Lu, Xinming Li,\* and Hongwei Gu\*

<sup>5</sup> Received (in XXX, XXX) Xth XXXXXXXXXX 200X, Accepted Xth XXXXXXXXXX 200X

DOI: 10.1039/b000000x

**Figure S1.** Optical images of the in-situ formed Pd nanoparticles. (2~3 mg Pd(acac)<sub>2</sub>, 1 mmol KOH and 2 mL ethanol, at 70 °C for 1 h under 1 atm of hydrogen)

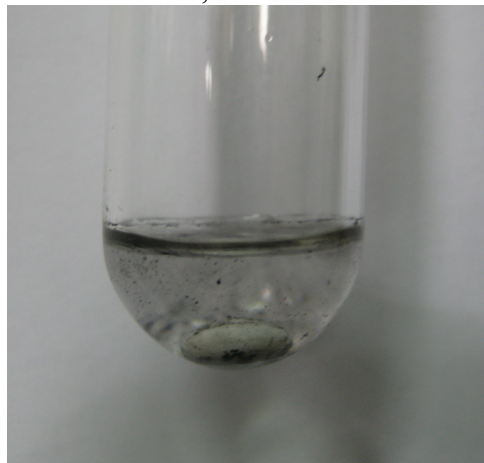

10

**Table S1** Effect of Solvent on Coupling Reactions of Nitrobenzene<sup>a</sup>

| Entry          | Solvent          | Temp. (°C). | Conv. (%) <sup>b</sup> | Select. (%) <sup>b</sup> |      |      |
|----------------|------------------|-------------|------------------------|--------------------------|------|------|
|                |                  |             |                        | a                        | b    | c    |
| 1              | o-xylene         | 120         | >99                    | 78.2                     | -    | 21.8 |
| 2              | m-xylene         | 120         | >99                    | 75.1                     | -    | 24.9 |
| 3              | p-xylene         | 120         | >99                    | 74.7                     | -    | 25.3 |
| 4              | toluene          | 100         | >99                    | 68.6                     | -    | 31.4 |
| 5              | n-heptane        | 100         | 76.3                   | 15.0                     | 64.9 | 20.1 |
| 6              | dioxane          | 100         | 95.6                   | 82.2                     | 6.9  | 10.9 |
| 7              | DMF              | 100         | >99                    | 41.0                     | -    | 59.0 |
| 8 <sup>c</sup> | ethanol          | 70          | 100                    | 96.8                     | -    | 3.2  |
| 9              | methanol         | 70          | 98.0                   | 18.6                     | 2.9  | 78.5 |
| 10             | 2-propanol       | 70          | 97.5                   | 4.0                      | 78.5 | 17.5 |
| 11             | acetonitrile     | 70          | 28.4                   | 6.6                      | 71.7 | 21.7 |
| 12             | H <sub>2</sub> O | 70          | >99                    | 33.6                     | -    | 66.4 |

<sup>a</sup> All reactions were carried out with 2~3 mg of Pd(acac)<sub>2</sub> catalyst, 1 mmol nitrobenzene, 1 mmol KOH, and 2 mL solvent at the appropriate temperature for 6 h under 1 atm of hydrogen. <sup>b</sup> GC yield. <sup>c</sup> 1.5 h.

15

**Table S2** Effect of Base on Coupling Reactions of Nitrobenzene<sup>a</sup>

| Entry | Base(mmol)                             | T(h) | Conv. (%) <sup>b</sup> | Select. (%) <sup>b</sup> |        |         |
|-------|----------------------------------------|------|------------------------|--------------------------|--------|---------|
|       |                                        |      |                        | Azo-                     | Azoxy- | aniline |
| 1     | none                                   | 12   | 100                    | -                        | -      | 100     |
| 2     | K <sub>2</sub> CO <sub>3</sub> (1)     | 12   | 100                    | 2.5                      | -      | 97.5    |
| 3     | NaOH(1)                                | 1.5  | 45                     | 84.8                     | -      | 15.2    |
| 4     | NaOH(1)                                | 12   | 100                    | 78.5                     | -      | 21.5    |
| 5     | KOH(1)                                 | 1.5  | 100                    | 96.8                     | -      | 3.2     |
| 6     | (CH <sub>3</sub> ) <sub>3</sub> COK(1) | 1.5  | 100                    | 96.9                     | -      | 3.1     |
| 7     | KOH(0.25)                              | 1.5  | 100                    | 52.9                     | -      | 47.1    |
| 8     | KOH(0.5)                               | 1.5  | 100                    | 79.5                     | -      | 20.5    |
| 9     | KOH(2)                                 | 1.5  | 85.7                   | 4.4                      | 92.5   | 3.1     |
| 10    | KOH(4)                                 | 1.5  | 64.8                   | 2.8                      | 84.1   | 13.1    |

<sup>a</sup> All reactions were carried out with 2~3mg of Pd(acac)<sub>2</sub> catalyst, 1 mmol nitrobenzene, base, and 2 mL anhydrous ethanol at 70 °C for the appropriate time under 1 atm of hydrogen. <sup>b</sup> GC yield.

**Table S3.** The Activity of the Catalysts Using Pd(acac)<sub>2</sub> And Fresh In-situ Formed Pd Particles<sup>a</sup>

|                                    | T(h) | Conv.(%) <sup>b</sup> | Select.(%) <sup>b</sup> |        |         |
|------------------------------------|------|-----------------------|-------------------------|--------|---------|
|                                    |      |                       | Azo-                    | Azoxy- | aniline |
| In-situ formed Pd nanoparticles    | 25   | 62.7                  | 4.7                     | 46.3   | 49.0    |
| Pd(acac) <sub>2</sub> <sup>c</sup> | 2    | 100                   | 96.6                    | -      | 3.4     |

<sup>a</sup> All reactions were carried out with 1 mmol nitrobenzene, 1 mmol KOH, and 2 mL ethanol at 70 °C for appropriate time under 1 atm of hydrogen. <sup>b</sup> GC yield. <sup>c</sup> 2~3 mg Pd(acac)<sub>2</sub> as the catalysts.

10

15

20

**Table S4** Aromatic Azos Formation from Different Corresponding Nitroaromatic Compounds<sup>a</sup>

$$\text{R-NO}_2 \xrightarrow[\text{KOH, 70}^\circ\text{C, Anhydrous ethanol}]{\text{Pd(acac)}_2, \text{H}_2} \text{R-N=N-Ar}$$

| Entry          | Product | T(h) | Yield(%) <sup>b</sup> |
|----------------|---------|------|-----------------------|
| 1              |         | 6    | 90.1                  |
| 2              |         | 6    | 96.4                  |
| 3 <sup>c</sup> |         | 24   | 96.6                  |
| 4 <sup>d</sup> |         | 24   | 64.4                  |
| 5 <sup>d</sup> |         | 24   | 45.7                  |
| 6 <sup>e</sup> |         | 3    | 83.5                  |
| 7 <sup>f</sup> |         | 24   | 18.7                  |
| 8 <sup>g</sup> |         | 24   | 81.3                  |
| 9 <sup>h</sup> |         | 3    | 18.3                  |

<sup>a</sup> All reactions were carried out with 2~3mg of Pd(acac)<sub>2</sub> catalyst, 1 mmol nitroaromatic compounds, 1 mmol KOH, and 2 mL ethanol at 70°C for the appropriate time under 1 atm of hydrogen, <sup>b</sup> Isolated yield. <sup>c</sup> 5 atm of H<sub>2</sub>. <sup>d</sup> 100°C, toluene as the solvent. <sup>e</sup> 1 atm of mixture of H<sub>2</sub> and N<sub>2</sub>. <sup>f</sup> 100°C, pyridine as the solvent. <sup>g</sup> 80°C, water as the solvent. <sup>h</sup> 5 atm of H<sub>2</sub>. All reactions were exposed to air at the appropriate temperature for 2 h.

## NMR data of the Azos:

### 1. Azobenzene

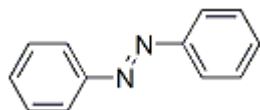

$^1\text{H NMR}$ (400 MHz,  $\text{CDCl}_3$ ): $\delta$ =7.95-7.93(d, 4H), 7.54-7.47(m, 6H).

$^{13}\text{C NMR}$ (100 MHz,  $\text{CDCl}_3$ ):  $\delta$ =123.07, 129.31, 131.22, 152.85.

### 2. 1,2-dip-tolyldiazene

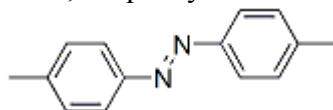

$^1\text{H NMR}$ (400 MHz,  $\text{CDCl}_3$ ): $\delta$ =7.83-7.81(d,4H), 7.32-7.30(d,4H),2.44(s,6H).

$^{13}\text{C NMR}$  (100 MHz,  $\text{CDCl}_3$ ):  $\delta$  = 21.71, 122.92, 129.91, 141.43, 150.99.

### 3. 1,2-dim-tolyldiazene

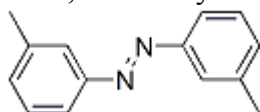

$^1\text{H NMR}$  (400 MHz,  $\text{CDCl}_3$ ):  $\delta$  = 7.73 (s, 4H), 7.43-7.39 (m, 2H), 7.31-7.26 (d, 2H), 2.47 (s, 6H).

$^{13}\text{C NMR}$  (100 MHz,  $\text{CDCl}_3$ ):  $\delta$  = 21.61, 120.70, 123.04, 129.11, 131.91, 139.19, 152.97.

### 4. 1,2-dio-tolyldiazene

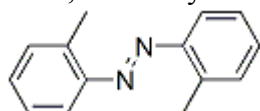

$^1\text{H NMR}$  (400 MHz,  $\text{CDCl}_3$ ):  $\delta$  = 7.62-7.60(d,2H),7.33-7.30(m, 4H),7.24-7.22(m, 2H),2.72(s, 6H).

$^{13}\text{C NMR}$  (100 MHz,  $\text{CDCl}_3$ ):  $\delta$  = 17.88, 116.07, 126.60, 130.92, 138.26, 151.31.

### 5. 1,2-bis(4-methoxyphenyl)diazene

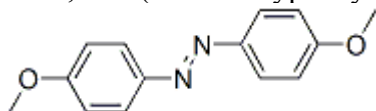

$^1\text{H NMR}$  (400 MHz,  $\text{CDCl}_3$ ):  $\delta$  = 7.89-7.87 (d, 4H), 7.01-6.99 (d, 4H), 3.89 (s, 6H).

$^{13}\text{C NMR}$  (100 MHz,  $\text{CDCl}_3$ ):  $\delta$  = 55.78, 114.37, 124.55, 147.26, 161.81.

### 6. 1,2-bis(2-methoxyphenyl)diazene

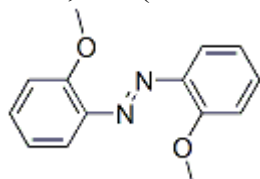

$^1\text{H NMR}$  (400 MHz,  $\text{CDCl}_3$ ):  $\delta$ =7.65-7.61 (m, 2H), 7.42-7.39 (m, 2H), 7.09-7.06 (m, 2H), 7.03-6.98 (m, 2H), 4.02 (s, 6H).

$^{13}\text{C NMR}$  (100 MHz,  $\text{CDCl}_3$ ):  $\delta$  =56.28, 112.43, 116.96, 120.78, 125.26, 132.20, 145.24.

### 7. 4,4'-azobis(N,N-dimethylaniline)

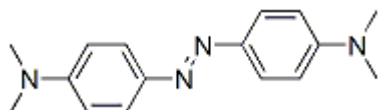

<sup>1</sup>H NMR (400 MHz, CDCl<sub>3</sub>): δ = 7.83-7.80 (d, 4H), 6.77-6.75 (d, 4H), 3.06 (s, 12H).

<sup>13</sup>C NMR (100 MHz, CDCl<sub>3</sub>): δ = 40.50, 110.42, 126.34, 142.92, 154.42.

8. DimethylAzobenzene-4,4'-dicarboxylate

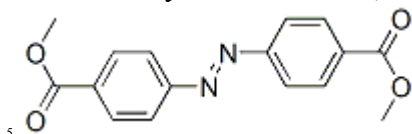

<sup>1</sup>H NMR (400 MHz, CDCl<sub>3</sub>): δ = 8.23-8.20 (d, 4H), 7.99-7.97 (d, 4H), 3.97 (s, 6H).

<sup>13</sup>C NMR (100 MHz, CDCl<sub>3</sub>): δ = 51.85, 123.15, 130.91, 131.82, 154.23, 166.30.

9. Azobenzene-4,4'-dicarboxylic acid

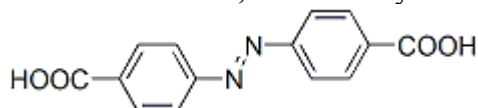

<sup>1</sup>H NMR (400 MHz, D<sub>2</sub>O): δ = 8.02-7.99 (d, 4H), 7.89-7.86 (d, 4H).

<sup>13</sup>C NMR (100 MHz, D<sub>2</sub>O): δ = 122.44, 130.06, 139.25, 153.67, 174.86.

10. 4,4'-diacetylazobenzene

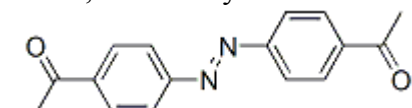

<sup>1</sup>H NMR (400 MHz, CDCl<sub>3</sub>): δ = 8.14-8.12 (d, 4H), 8.03-8.00 (d, 4H), 2.68(s, 3H).

<sup>13</sup>C NMR (100 MHz, CDCl<sub>3</sub>): δ = 27.13, 123.42, 129.63, 140.12, 154.50,

197.69.
